# Supplementary material for: Direct synthesis of MoS2 or MoO3via thermolysis of a dialkyl dithiocarbamato molybdenum(iv) complex
Source: Royal Society of Chemistry journal article supplement (doi:10.1039/c8cc08932a), 2018-11-29
Supplement: c8cc08932a1.pdf [file c8cc08932a1.pdf]

Electronic Supporting Information

## Direct Synthesis of MoS<sub>2</sub> or MoO<sub>3</sub> via Thermolysis of a Dialkyl Dithiocarbamate Molybdenum(IV) Complex

Niting Zeng,<sup>a</sup> David G. Hopkinson,<sup>a</sup> Ben F. Spencer,<sup>a</sup> Simon McAdams,<sup>a</sup> Aleksander A. Tedstone,<sup>b</sup> Sarah J. Haigh<sup>a</sup> and David J. Lewis<sup>a\*</sup>

<sup>a</sup>School of Materials, University of Manchester, Oxford Road, M13 9PL, UK.

<sup>b</sup>School of Chemistry, University of Manchester, Oxford Road, M13 9PL, UK.

Email: david.lewis-4@manchester.ac.uk

### Experimental

#### Synthesis of Mo(DTC)<sub>4</sub>

Mo(DTC)<sub>4</sub> was prepared using the method detailed in Lewis et al (Chem. Mater. 2015). Briefly, molybdenum hexacarbonyl (1.0 eq., 3.7 mmol) and tetraethylthiuram disulphide (2.0 eq., 7.4 mmol) were mixed in 40 mL acetone and then heated under reflux at 80 °C for 2 h. The product was then left to cool down to room temperature and stored in freezer overnight to allow full crystallisation to occur. The dark purple crystalline material produced was isolated by vacuum filtration and rinsed with pentane (3 × 20 mL). Anal. Calc. for C<sub>20</sub>H<sub>40</sub>N<sub>4</sub>S<sub>8</sub>Mo: C, 34.9; H 5.9; N, 8.1%. Found: C, 34.5; H 5.8; N, 8.0%. FT-IR (solid)  $\nu_{\text{max}}/\text{cm}^{-1}$ : 2973 (w), 2927 (w), 2867 (w), 1516 (m), 1495 (m), 1454 (m), 1435 (m), 1376 (m), 1350 (m), 1274 (m), 1205 (m), 1149 (m), 1090 (m), 1068 (m), 987 (m).

#### Solventless Thermolysis

Thermolysis was carried out by heating the Mo(DTC)<sub>4</sub> powder (placed in a ceramic boat and positioned in the centre of a Carbolite MTF furnace) to 450 °C and kept at this temperature for one hour under argon or air to produce MoS<sub>2</sub> or MoO<sub>3</sub> respectively. The final products (black/grey powders) were collected after the system was cooled to room temperature.

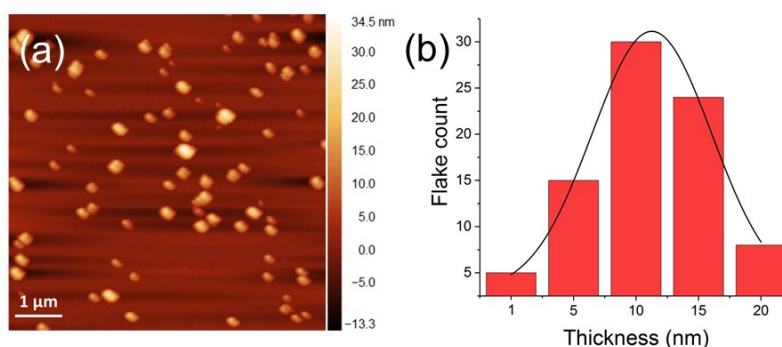

Figure S1: AFM analysis of product of thermolysis of Mo(DTC)<sub>4</sub> at 450 °C under argon.
